# Supplementary material for: Cisplatin-induced DNA double-strand breaks promote meiotic chromosome synapsis in PRDM9-controlled mouse hybrid sterility
Source: eLife. 2018 Dec 28;7:e42511. doi: 10.7554/eLife.42511 (PMC6324875; doi:10.7554/eLife.42511)
Supplement: Figure 2—source data 1. [file elife-42511-fig2-data1.xlsx]

## Sheet: Sheet1
Figure 2–source data 1. Distribution of Edu+ and EdU- spermatocytes at the first prophase 40 hrs after EdU and cisPt injection
	RPA		DMC1		Total		Proportion
	Edu+	EdU-	Edu+	EdU-	Edu+	EdU-	EdU+	EdU-	EdU+ S.E.
Lepto	63	10	43	10	106	20	0.84127	0.15873	0.033
Zygo	129	118	121	139	250	257	0.493097	0.506903	0.022
Pachy	0	238	0	235	0	473	0	1
			.
			.
