# Supplementary material for: Cisplatin-induced DNA double-strand breaks promote meiotic chromosome synapsis in PRDM9-controlled mouse hybrid sterility
Source: eLife. 2018 Dec 28;7:e42511. doi: 10.7554/eLife.42511 (PMC6324875; doi:10.7554/eLife.42511)
Supplement: Figure 3—figure supplement 1—source data 1. [file elife-42511-fig3-figsupp1-data1.xlsx]

## Sheet: RPA controls
Figure 3–figure supplement 1–source data 1. RPA foci in spermatocytes of PWD, B6 and PBF1 males.
PWD-EZ	B6-EZ	F1-EZ	PWD-MZ	B6-MZ	F1-MZ	PWD-LZ	B6-LZ	F1-LZ	PWD-EP	B6-EP	F1-EP	PWD-MP	B6-MP	F1-MP	PWD-LP	B6-LP
	68	170	276	193	235	241	189	170	177	26	147	4	0	167	4	0
	69	169	129	223	283	243	179	169	132	136	110	9	7	121	2	2
	129	260	217	217	223	220	187	260	125	81	152	7	28	116	2	2
	268	44	202	163	232	175	202	196	148	97	153	8	55	144	2	0
	180	196	209	209	301	165	207	254	194	94	165	16	4	100	16	0
		240	264	166	180		196	295	198	130	148	1	5	121	4	0
		96	147	161	181		203	252	109	115	203	56	16	119	2	0
		92	136	149	205		170	207	107	125	152	83	0	98	4	16
		102	171	165	301		203	145	114	102	162	57	3	78	3	1
		195	240	164	249		262	192	134	135	164	11	40	72	0	0
		181	234	164	226			127	124	123	163	50	125	63	15	2
			238		219			160	170	120	111	1	117	84	3	2
			177		240			194		139	174	0	21	91	0	5
			221		249			188		91	142	72	24	75	0	2
			246		168			258		134	80	46	29	89	0	0
			286		192			247		69	88	106	7	96	15	0
			264		163			183		156	109	113	0	102	3	0
			198		135			222		39	119	162	30		4	2
			220		104			180		124	176	64	38		2	0
			204		193			208		94	53	81	8		1	2
			250		231			163		145	165	71	34		1	0
			203		263			170		24	111	6	19		1	0
			172		194			173		132	91	8	19		0
			161		213			158		132	113	130	12		6
			249		223			153		71	97	99	8		3
			224		207			195		125	95	81	16
			251		253			192		150	155	9	2
			266		54			231		141	146	17	10
			264		53			310		190	155	36	39
			236		221			160		153	161	88	9
					147			165		131	123	83	4
					136			183		139	62	17	3
								107		146	147	22	145
											135	59	90
												98	3
												11	91
												8	10
												47	1
												102
												47
												42
												16
												16
												15
												38
												102
												39
												121
												56
												96
												112
												57
												33
												34
												7
												14
												11
												20
												94
												36
												33
												72
												26
												28
												14
