# Supplementary material for: Cisplatin-induced DNA double-strand breaks promote meiotic chromosome synapsis in PRDM9-controlled mouse hybrid sterility
Source: eLife. 2018 Dec 28;7:e42511. doi: 10.7554/eLife.42511 (PMC6324875; doi:10.7554/eLife.42511)
Supplement: Figure 3—source data 1. [file elife-42511-fig3-data1.xlsx]

## Sheet: Sheet1
Figure 3–source data1. RPA foci in leptonemas (L), zygonemas (Z) and pachynemas (P) of PBF1 hybrid males treated with cisPt.
L_Control	L_1 mg/kg	L_5mg/kg	L_10 mg/kg	Z_Control	Z_1 mg/kg	Z_5mg/kg	Z_10 mg/kg	P_Control	P_1 mg/kg	P_5mg/kg	P_10 mg/kg
204	240	260	308	168	146	136	179	80	86	117	178
155	237	208	359	183	154	132	153	88	100	87	196
77	210	242	282	192	218	130	144	109	77	89	54
217	199	210	305	163	144	173	165	119	62	183	56
109	153	243	441	160	165	134	154	121	54	57	88
190	151	264	247	165	191	164	401	119	94	74	93
125	106	229	96	135	153	128	97	98	83	150	49
169	211	328	196	104	184	210	311	176	58	135	84
	146	340	239	193	199	205	201	78	147	109	133
	120	167	218	44	194	99	448	53	98	105	122
	92	266	221	231	172	71	308	72	154	82	119
	195	197	229	263	199	95	188	63	114	111	138
	355	311	75	194	161	112	207	84	162	90	149
	241	177	326	213	210	112	215	165	77	86	98
	135	219	79	223	193	144	331	111	147	129	117
	117	165	206	207	172	100	210	91	141	95	104
	127	136	118	253	223	106	220	113	134	107	104
	178	139		196	160	177	223	97	148	91	92
	88	118		240	230	191	270	95	149	92	50
	177	63		107	151	164	170	155	109	73	71
	86	82		54	171	204	141	146	198	54	85
	104	84		53	197	223	175	155	179	64	204
		126		96	255	286	201	161	115	84	132
				92	341	351	146	91	116	112	69
				102	264	188	173	75	114	103	86
				195	325	173	171	89	136	116	112
				181	290	329	186	123	89	88	157
				221	243	221	152	62	125	87	134
				147	213	194	160	96	102	101	77
				136	175	371	163	147	74	112	85
				196	231	204	237	135	76	104	135
				254	223	318	208	102	112	61	107
				235	155	324	211	98	150	135	91
				283	186	280	269	147	99	73	111
				223	322	188	277	110	157	104	181
				295	106	174	223	152	94	74	146
				252	97	170	227	153	132	81	115
				170	87	217	334	165	124	133	84
				169	228	273	212	148	144	109	150
				207	239	260	281	203	114	150	144
				145	235	267	250	152	195	150	154
				192	184	290	297	162	205	153	163
				127	178	206	339	164	225	134	95
				160	211	267	361	163	173	119	80
				194	184	194	159	111	146	90	90
				188	303	251	196	174	175	161	111
				258	257	250	374	121	216	187	130
				247	226	255	317	142	193	142	68
				183	237	337		167	167	143	141
				232	212	354		116	169	161	153
				222	187	230		144	150	115	82
				180	217	291		100	143	181	133
				208	208	276			215	175	139
				163	205	385			84	164	136
				170	364				179	154	129
				173	371				125	157	124
				158	260				143	137	163
				153	390				126	121	109
				195	279				137	185	178
				192	277				205	245	172
				231	195				187		153
				301	212				181
				260	224				143
				180	256				160
				181	226				162
				205	259
				310	263
				301	267
				249	258
				226	344
				219	182
				240	229
				249
