# Supplementary material for: Cisplatin-induced DNA double-strand breaks promote meiotic chromosome synapsis in PRDM9-controlled mouse hybrid sterility
Source: eLife. 2018 Dec 28;7:e42511. doi: 10.7554/eLife.42511 (PMC6324875; doi:10.7554/eLife.42511)
Supplement: Figure 4—figure supplement 1—source data 1. [file elife-42511-fig4-figsupp1-data1.xlsx]

## Sheet: Sheet1
Figure 4–figure supplement 1–source data 1. DMC1 foci in spermatocytes of PWD, B6 and PBF1 males.
PWD-EZ	B6-EZ	F1-EZ	PWD-MZ	B6-MZ	F1-MZ	PWD-LZ	B6-LZ	F1-LZ	PWD-EP	B6-EP	F1-EP	PWD-MP	B6-MP	F1-MP	PWD-LP	B6-LP
220	174	167	126	198	186	183	180	238	47	0	62	1	0	49	0	0
202	242	300	310	253	157	91	268	170	60	0	138	3	0	115	0	0
200	134	338	214	239	160	129	174	98	53	32	177	5	0	75	0	0
	217	164	253	215	243	145	192	100	53	11	161	8	0	70	0	0
	184	319	190	165	174	140	207	43	76	16	66	4	0	85	3	0
	241	301	173	234	110	83	208	37	61	8	94	2	0	64	0	0
	184	209	206	136	105	53	181	75	29	14	97	30	0	90	0	0
	221	195	237	150	170	171	141	274	70	44	79	0	10	80	1	0
		260	110	183	236		95	107	57	52	74	18	0	89	0	0
		290	229	192	104		106	224	71	5	110	0	0	132	0	0
		321	198	166	271		102	240	71	55	54	0	18	105	0	0
		255	148	218	91		189	233	73	26	170	11	0	103	1	0
			229	209	114		145		93	59	167	0	0	68	0	0
			175		64		176		79	39	114	55	0	90	0	0
			171		258		44		103	50	111	64	0	89	0	0
			194		220		56		3	20	150	44	0	39	0	0
			96		236		97		31	24	83	54	0	71		0
			178		260				23	0	126	0	0			0
			186		267					40	119	1	0			0
			197		180					54	190	55	0
			188		195					50	89	49	0
			231		205					56	169	30	0
			208		307					30	109	0	0
			182		231					43	127	0	0
			124		291					29	83	18	0
			167		215					64	135	43
			228		282						231	0
			172		183						151	0
			165		165						29	0
					301						119	7
					226						86	11
											109	0
											120	0
											69	0
											135	0
											117	54
											126	33
											99	0
											87	0
											119	0
											111	0
											106	21
											112	26
											106	32
											121	25
											110	32
											102	21
											106	21
											101	25
											43	22
											80	0
											115	0
											126	18
												19
												31
												33
												26
												36
												35
												49
												1
												0
												0
												0
												41
												19
												0
												0
