# Supplementary material for: Cisplatin-induced DNA double-strand breaks promote meiotic chromosome synapsis in PRDM9-controlled mouse hybrid sterility
Source: eLife. 2018 Dec 28;7:e42511. doi: 10.7554/eLife.42511 (PMC6324875; doi:10.7554/eLife.42511)
Supplement: Figure 4—source data 1. [file elife-42511-fig4-data1.xlsx]

## Sheet: Sheet1
Figure 4–source data 1. DMC1 foci in zygonemas (Z) and pachynemas (P) of PBF1 hybrid males treated with cisPt.
Z_Control	Z_1mg/kg	Z_5mg/kg	Z_10mg/kg	P_Control	P_1mg/kg	P_5mg/kg	P_10mg/kg
238	201	248	218	132	156	106	164
186	202	212	240	105	161	107	107
157	236	229	162	103	112	108	76
160	163	213	264	68	88	90	176
243	166	213	227	135	89	115	104
170	209	286	142	117	76	85	123
98	249	255	218	126	100	167	87
100	258	224	256	99	156	107	107
226	197	179	217	87	141	74	108
174	258	227	270	119	58	79	76
110	296	188	184	111	99	68	66
105	212	230	316	106	70	53	94
170	135	239	218	112	68	197	105
236	305	210	252	90	88	94	59
104	276	225	187	89	60	125	127
271	315	162	177	39	88	105	131
91	239	208	134	71	75	152	150
114	233	276	282	106	89	137	35
64	228	128	243	121	95	168	103
258	215	138	257	110	70	156	158
220	259	135	246	102	107	166	75
43	249	181	250	106	131	195	93
37	312	294	242	101	160	167	205
75	315	309	367	43	154	56	198
236	313	274	271	80	166	94	189
260	278	279	266	115	191	100	122
267	260	293	303	126	30	105	118
167	116	195	253	49	84	108	166
180	171	224	258	62	110	149	112
195	156	250	243	138	89	193	168
274	180	269	337	177	119	74	50
300	134	256	275	161	126	111	39
338	107	265	244	66	92	115	42
205	199	263	163	94	124	18	67
107	365	249	214	97	101	61	67
224	158	209	251	79	24	86	157
240	214	124	165	74	92	174	159
164	159	212	291	110	127	123	95
319	398	123	243	54	142	92	125
301	121	139	223	115	36	102	108
307	156	234	303	170	64	84	123
209	311	308	211	167	143		96
195	330	270	342	114	87		92
260	241	233	346	75	99		111
290	264	323	255	70	45		122
321	276	241	105	111	46		90
255	235	204	302	150	80		182
231	258	229	228	83	115		181
291	180	144	268	126	95		66
215	120	122	261	119	109		77
282	321	269	252	190	91		99
183	320	220	270	89	124		196
233	323	191	159	169	117		122
165	248	295	315	109	177		139
301	328	292	108	127	60		108
	331	247	134	83	133		100
	382	272	237	85	115		144
	187	277	324	64	119		60
	256	203	373	135	80		60
	196	221	280	231			98
	243	288	267	90			119
	261	283		151			117
	238	135		29			143
		200		119			121
		334		86			58
		310		80
		302		89
		230		109
		226		120
		125		69
		98
		327
		242
		165
		226
		270
		280
		275
		339
		320
		354
