# Supplementary material for: Cisplatin-induced DNA double-strand breaks promote meiotic chromosome synapsis in PRDM9-controlled mouse hybrid sterility
Source: eLife. 2018 Dec 28;7:e42511. doi: 10.7554/eLife.42511 (PMC6324875; doi:10.7554/eLife.42511)
Supplement: Figure 4—source data 2. [file elife-42511-fig4-data2.xlsx]

## Sheet: Sheet1
Figure 4–source data 2. DMC1 foci in EdU-negative (E-) and EdU-positive (E+) zygonemas of PBF1 hybrid males treated with cisPt.
E-_Control	E-_1mg/kg	E-_5mg/kg	E-_10mg/kg	E+_Control	E+_1mg/kg	E+_5mg/kg	E+_10mg/kg
238	201	248	218	174	305	294	282
186	202	212	240	110	276	309	243
157	236	229	162	105	315	274	257
160	163	213	264	170	239	279	246
243	166	213	227	236	233	293	250
170	209	286	142	104	228	195	242
98	249	255	218	271	215	224	367
100	258	224	256	91	259	250	271
226	197	179	217	114	249	269	266
43	258	227	270	64	312	256	303
37	296	188	184	258	315	265	253
75	212	230	316	220	313	263	258
236	135	239	218	164	278	249	261
260	116	210	252	319	260	209	252
267	171	225	187	301	311	334	270
167	156	162	177	307	330	310	159
180	180	208	134	209	241	302	315
195	134	276	243	195	264	230	108
274	107	128	337	260	276	226	134
300	199	138	275	290	235	125	237
338	365	135	244	321	258	98	324
205	158	181	163	255	180	327	373
107	214	124	214	231	120	242	280
224	159	212	251	291	321	165	267
240	398	123	165	215	320	226
	121	139	291	282	323	270
	156	234	243	183	248	280
		308	223	233	328	275
		270	303	165	331	339
		233	211	301	382	320
		323	342		187	354
		241	346		256
		204	255		196
		229	105		243
		144	302		261
		122	228		238
		269	268
		220
		191
		295
		292
		247
		272
		277
		203
		221
		288
		283
		135
		200
