# Supplementary material for: Cisplatin-induced DNA double-strand breaks promote meiotic chromosome synapsis in PRDM9-controlled mouse hybrid sterility
Source: eLife. 2018 Dec 28;7:e42511. doi: 10.7554/eLife.42511 (PMC6324875; doi:10.7554/eLife.42511)
Supplement: Figure 5—source data 1. — Pilot experiment, one male per column. [file elife-42511-fig5-data1.xlsx]

## Sheet: Sheet1
Figure 5–source data 1. The effect of cisPt (10 mg/kg) on chromosome synapsis at pachytene in sterile PBF1 hybrid males 0 to 8 days after treatment. Pilot experiment, 1 male per column.
Control (Day 0)	Day 4	Day 5	Day 7	Day 7	Day 8
0	0	0	0	0	0
0	0	0	0	0	0
0	0	0	0	0	0
0	0	0	0	0	0
0	0	0	0	0	0
0	0	0	0	0	0
1	0	0	0	0	0
1	0	0	0	0	0
1	0	0	0	0	0
1	0	0	0	0	0
1	0	0	0	0	0
1	0	0	0	0	0
2	0	0	0	0	0
2	0	0	0	0	0
2	0	0	0	0	0
2	0	0	0	0	0
2	0	0	0	0	0
2	0	0	0	0	0
2	0	0	0	0	0
2	0	0	0	0	0
2	0	0	0	0	0
2	0	0	0	0	0
2	0	0	0	0	0
2	0	0	0	0	0
2	0	0	0	0	0
3	0	0	0	0	0
3	0	0	0	0	0
3	0	0	0	0	0
3	0	0	0	0	0
3	0	0	0	0	0
3	0	0	0	0	0
3	0	0	0	0	0
3	0	0	0	0	0
3	1	0	0	0	0
3	1	1	0	0	0
4	1	1	0	0	0
4	1	1	0	0	0
4	1	1	0	0	0
4	1	2	0	0	0
4	1	2	0	0	0
4	2	2	0	0	0
4	2	2	0	0	0
4	2	2	0	0	0
4	2	2	0	0	1
4	2	2	1	0	1
4	2	2	1	0	1
4	2	2	1	0	1
4	2	2	1	0	1
4	2	2	1	0	1
4	2	2	1	0	1
4	2	2	1	0	1
5	2	2	2	0	1
5	2	2	2	0	1
5	2	2	2	0	2
5	2	2	2	0	2
5	2	2	2	0	2
5	2	2	2	1	2
5	2	2	2	1	2
5	2	2	2	1	2
6	2	3	2	1	2
6	2	3	2	1	2
6	2	3	2	1	2
6	2	3	2	1	2
6	2	3	2	2	2
6	2	3	2	2	2
6	2	4	2	2	2
6	3	4	2	2	2
6	3	4	2	2	2
6	4	4	2	2	2
6	4	4	2	2	2
6	4	4	2	2	2
6	4	4	2	2	2
6	4	4	2	2	2
7	4	4	2	2	2
7	4	4	2	2	2
7	4	4	2	2	2
7	4	4	2	2	2
7	4	4	2	2	2
7	5	5	3	2	2
7	5	5	3	2	2
7	5	5	3	2	2
7	5	6	4	2	3
7	5	6	4	2	3
7	6	6	4	2	3
8	6	7	4	2	3
8	6	8	4	3	4
8	6	8	4	3	4
8	6	8	4	3	4
8	6	9	4	3	5
8	6	9	4	3	5
8	8	9	4	3	5
8		11	5	3	9
8			6	3
8			6	4
8			6	4
9			6	4
9			6	4
10			6	4
10			7	4
10			9	5
11			9	5
11				5
12				5
12				7
12
13
