# Supplementary material for: Cisplatin-induced DNA double-strand breaks promote meiotic chromosome synapsis in PRDM9-controlled mouse hybrid sterility
Source: eLife. 2018 Dec 28;7:e42511. doi: 10.7554/eLife.42511 (PMC6324875; doi:10.7554/eLife.42511)
Supplement: Figure 5—source data 2. — Syn = apparently complete synapsis of all chromosomes. Asyn = one or more pairs of homologous chromosomes are asynapsed. [file elife-42511-fig5-data2.xlsx]

## Sheet: 20180911_8days.autosome
Figure 5–source data 2. Evaluation of meiotic chromosome synapsis at pachytene stage in PBF1 males treated with cisPt. Syn=apparently complete synapsis of all chromosomes. Asyn= one or more pairs of homologous chromosomes are asynapsed.
# CisPt raw asynapsis data. Liu Wang
Each row out of 645 has one of the following values:
# mouse_id: 74956; 80098; 74955; 74954; 85545; 74959; 74957; 85546
# cell_pseudoid:
# CisPt_dose_mg/kg: 0; 5; 10
# pach_stage: early; mid; late
# syn_asyn: syn; asyn
# EdU: pos; neg
mouse_id	cell_pseudoid	CisPt_dose_mgkg	pach_stage	syn_asyn	EdU
74956	1	0	early	asyn	neg
74956	2	0	early	asyn	pos
74956	3	0	early	asyn	pos
74956	4	0	early	syn	neg
74956	5	0	mid	syn	neg
74956	6	0	early	syn	neg
74956	7	0	early	asyn	pos
74956	8	0	mid	asyn	neg
74956	9	0	early	asyn	neg
74956	10	0	early	asyn	pos
74956	11	0	early	asyn	neg
74956	12	0	early	syn	pos
74956	13	0	early	asyn	pos
74956	14	0	mid	syn	neg
74956	15	0	early	asyn	pos
74956	16	0	early	asyn	neg
74956	17	0	early	asyn	pos
74956	18	0	early	asyn	pos
74956	19	0	early	asyn	pos
74956	20	0	early	asyn	pos
74956	21	0	early	asyn	neg
74956	22	0	mid	syn	neg
74956	23	0	early	asyn	neg
74956	24	0	early	asyn	pos
74956	25	0	early	asyn	neg
74956	26	0	early	asyn	pos
74956	27	0	early	syn	pos
74956	28	0	early	asyn	pos
74956	29	0	early	asyn	neg
74956	30	0	early	asyn	pos
74956	31	0	early	asyn	pos
74956	32	0	early	asyn	pos
74956	33	0	early	asyn	pos
74956	34	0	early	asyn	neg
74956	35	0	mid	asyn	neg
74956	36	0	early	asyn	pos
74956	37	0	early	asyn	neg
74956	38	0	mid	asyn	neg
74956	39	0	early	asyn	neg
74956	40	0	early	asyn	neg
74956	41	0	early	asyn	pos
74956	42	0	mid	syn	neg
74956	43	0	early	asyn	pos
74956	44	0	early	asyn	pos
74956	45	0	early	asyn	pos
74956	46	0	mid	asyn	pos
74956	47	0	mid	asyn	pos
74956	48	0	early	asyn	neg
74956	49	0	early	asyn	pos
74956	50	0	mid	asyn	neg
74956	51	0	mid	asyn	neg
74956	52	0	early	asyn	pos
74956	53	0	mid	asyn	neg
74956	54	0	mid	asyn	neg
74956	55	0	early	asyn	neg
74956	56	0	early	asyn	neg
74956	57	0	early	asyn	pos
74956	58	0	early	asyn	pos
74956	59	0	early	asyn	pos
74956	60	0	early	asyn	pos
74956	61	0	mid	syn	neg
74956	62	0	early	asyn	neg
74956	63	0	early	syn	neg
74956	64	0	early	syn	neg
74956	65	0	early	asyn	pos
74956	66	0	early	asyn	pos
74956	67	0	early	asyn	pos
74956	68	0	early	asyn	neg
74956	69	0	early	asyn	pos
74956	70	0	early	asyn	neg
74956	71	0	early	asyn	neg
74956	72	0	early	asyn	neg
74956	73	0	early	asyn	neg
74956	74	0	early	asyn	pos
74956	75	0	early	asyn	pos
74956	76	0	mid	asyn	pos
74956	77	0	mid	asyn	neg
74956	78	0	mid	asyn	neg
74956	79	0	early	syn	neg
74956	80	0	early	asyn	neg
74956	81	0	early	asyn	pos
74956	82	0	early	asyn	neg
74956	83	0	early	asyn	neg
74956	84	0	mid	asyn	neg
74956	85	0	mid	asyn	neg
74956	86	0	mid	asyn	neg
74956	87	0	early	asyn	pos
74956	88	0	early	asyn	pos
74956	89	0	early	asyn	pos
74956	90	0	early	asyn	pos
74956	91	0	early	asyn	pos
74956	92	0	early	asyn	pos
74956	93	0	mid	syn	neg
74956	94	0	early	asyn	pos
74956	95	0	early	asyn	pos
74956	96	0	mid	asyn	neg
74956	97	0	mid	asyn	pos
74956	98	0	mid	asyn	neg
74956	99	0	mid	asyn	neg
74956	100	0	mid	asyn	neg
74956	101	0	mid	asyn	pos
74956	102	0	early	asyn	pos
74956	103	0	early	asyn	pos
80098	1	0	mid	asyn	pos
80098	2	0	early	asyn	neg
80098	3	0	early	asyn	neg
80098	4	0	early	asyn	neg
80098	5	0	mid	asyn	neg
80098	6	0	mid	asyn	neg
80098	7	0	early	syn	neg
80098	8	0	early	syn	neg
80098	9	0	early	asyn	neg
80098	10	0	early	asyn	pos
80098	11	0	early	asyn	pos
80098	12	0	early	asyn	pos
80098	13	0	early	asyn	pos
80098	14	0	early	asyn	neg
80098	15	0	early	syn	pos
80098	16	0	early	asyn	pos
80098	17	0	early	asyn	pos
80098	18	0	mid	asyn	neg
80098	19	0	mid	asyn	neg
80098	20	0	mid	asyn	neg
80098	21	0	mid	asyn	neg
80098	22	0	early	asyn	pos
80098	23	0	early	asyn	pos
80098	24	0	mid	asyn	neg
80098	25	0	mid	asyn	neg
80098	26	0	mid	asyn	neg
80098	27	0	mid	asyn	neg
80098	28	0	mid	asyn	neg
80098	29	0	mid	asyn	pos
80098	30	0	mid	asyn	pos
80098	31	0	early	asyn	pos
80098	32	0	mid	asyn	neg
80098	33	0	early	asyn	pos
80098	34	0	early	asyn	pos
80098	35	0	early	asyn	pos
80098	36	0	early	asyn	pos
80098	37	0	early	asyn	pos
80098	38	0	early	asyn	neg
80098	39	0	early	syn	neg
80098	40	0	late	asyn	neg
80098	41	0	late	asyn	neg
80098	42	0	mid	asyn	neg
80098	43	0	mid	asyn	neg
80098	44	0	mid	asyn	neg
80098	45	0	mid	syn	pos
80098	46	0	mid	asyn	neg
80098	47	0	early	asyn	neg
80098	48	0	early	asyn	neg
80098	49	0	early	asyn	neg
80098	50	0	mid	asyn	pos
80098	51	0	early	asyn	neg
80098	52	0	early	asyn	pos
80098	53	0	early	asyn	pos
80098	54	0	early	asyn	pos
80098	55	0	late	asyn	neg
80098	56	0	mid	asyn	pos
80098	57	0	mid	asyn	pos
80098	58	0	early	asyn	pos
80098	59	0	early	asyn	neg
80098	60	0	early	asyn	neg
80098	61	0	early	asyn	neg
80098	62	0	early	asyn	neg
80098	63	0	early	asyn	neg
80098	64	0	early	asyn	neg
80098	65	0	early	asyn	neg
80098	66	0	early	asyn	neg
80098	67	0	late	syn	pos
80098	68	0	early	asyn	pos
80098	69	0	early	asyn	neg
80098	70	0	early	asyn	pos
80098	71	0	early	asyn	pos
80098	72	0	mid	asyn	pos
80098	73	0	early	asyn	neg
80098	74	0	early	asyn	neg
80098	75	0	early	syn	neg
80098	76	0	early	asyn	pos
80098	77	0	mid	asyn	pos
80098	78	0	mid	asyn	neg
80098	79	0	early	asyn	pos
80098	80	0	mid	asyn	neg
80098	81	0	early	asyn	neg
80098	82	0	early	asyn	neg
80098	83	0	early	asyn	neg
80098	84	0	early	asyn	neg
80098	85	0	mid	asyn	neg
80098	86	0	early	asyn	pos
80098	87	0	early	asyn	neg
80098	88	0	early	asyn	neg
80098	89	0	mid	asyn	neg
80098	90	0	mid	asyn	pos
80098	91	0	mid	asyn	pos
80098	92	0	mid	asyn	pos
80098	93	0	mid	asyn	pos
74954	1	5	mid	syn	neg
74954	2	5	early	asyn	neg
74954	3	5	early	asyn	neg
74954	4	5	early	asyn	neg
74954	5	5	early	asyn	neg
74954	6	5	mid	asyn	neg
74954	7	5	early	asyn	pos
74954	8	5	early	asyn	pos
74954	9	5	mid	asyn	neg
74954	10	5	mid	asyn	neg
74954	11	5	early	asyn	neg
74954	12	5	early	syn	pos
74954	13	5	late	syn	neg
74954	14	5	early	asyn	neg
74954	15	5	early	asyn	neg
74954	16	5	early	asyn	neg
74954	17	5	mid	syn	neg
74954	18	5	early	asyn	neg
74954	19	5	early	syn	neg
74954	20	5	late	asyn	neg
74954	21	5	early	asyn	pos
74954	22	5	early	asyn	pos
74954	23	5	early	asyn	pos
74954	24	5	early	asyn	pos
74954	25	5	early	asyn	pos
74954	26	5	late	asyn	neg
74954	27	5	early	asyn	neg
74954	28	5	early	asyn	pos
74954	29	5	mid	asyn	neg
74954	30	5	early	asyn	neg
74954	31	5	early	asyn	neg
74954	32	5	mid	asyn	neg
74954	33	5	mid	asyn	neg
74954	34	5	mid	asyn	neg
74954	35	5	early	syn	neg
74954	36	5	late	syn	neg
74954	37	5	late	syn	neg
74954	38	5	mid	syn	neg
74954	39	5	early	asyn	pos
74954	40	5	late	syn	neg
74954	41	5	early	asyn	pos
74954	42	5	early	asyn	pos
74954	43	5	late	syn	neg
74954	44	5	late	syn	neg
74954	45	5	late	syn	neg
74954	46	5	early	syn	pos
74954	47	5	early	asyn	neg
74954	48	5	early	asyn	neg
74954	49	5	early	asyn	neg
74954	50	5	early	asyn	neg
74954	51	5	early	asyn	neg
74954	52	5	early	asyn	neg
74954	53	5	early	asyn	neg
74954	54	5	early	asyn	neg
74954	55	5	early	asyn	neg
74954	56	5	early	asyn	neg
74954	57	5	early	asyn	neg
74954	58	5	mid	asyn	neg
74954	59	5	late	syn	neg
74954	60	5	mid	asyn	neg
74954	61	5	early	asyn	neg
74954	62	5	early	asyn	neg
74954	63	5	early	syn	neg
74954	64	5	early	syn	neg
74954	65	5	early	asyn	neg
74954	66	5	early	asyn	neg
74954	67	5	early	syn	neg
74954	68	5	early	asyn	neg
74954	69	5	early	asyn	neg
74954	70	5	mid	asyn	neg
74954	71	5	mid	asyn	neg
74954	72	5	mid	asyn	neg
74954	73	5	early	asyn	neg
74954	74	5	late	syn	neg
74954	75	5	early	asyn	neg
74954	76	5	early	syn	neg
74954	77	5	early	syn	neg
74954	78	5	early	asyn	pos
74954	79	5	early	asyn	neg
74954	80	5	late	asyn	neg
74954	81	5	early	asyn	neg
74954	82	5	early	asyn	neg
74954	83	5	early	asyn	neg
74954	84	5	early	asyn	neg
74954	85	5	early	syn	neg
74954	86	5	early	asyn	pos
74954	87	5	early	asyn	pos
74954	88	5	late	asyn	neg
74954	89	5	early	asyn	neg
74954	90	5	early	asyn	pos
74954	91	5	early	asyn	pos
74954	92	5	late	asyn	neg
74954	93	5	late	asyn	neg
74954	94	5	late	syn	neg
74954	95	5	late	syn	neg
74954	96	5	mid	syn	neg
74954	97	5	early	syn	neg
74954	98	5	late	syn	neg
74955	1	5	early	asyn	pos
74955	2	5	early	asyn	neg
74955	3	5	early	asyn	pos
74955	4	5	mid	asyn	neg
74955	5	5	late	syn	neg
74955	6	5	early	asyn	pos
74955	7	5	early	asyn	neg
74955	8	5	mid	asyn	neg
74955	9	5	early	asyn	pos
74955	10	5	early	asyn	neg
74955	11	5	early	asyn	pos
74955	12	5	early	asyn	pos
74955	13	5	early	syn	neg
74955	14	5	early	asyn	pos
74955	15	5	early	asyn	pos
74955	16	5	early	asyn	pos
74955	17	5	early	asyn	neg
74955	18	5	early	asyn	neg
74955	19	5	early	asyn	neg
74955	20	5	mid	asyn	neg
74955	21	5	late	asyn	neg
74955	22	5	mid	asyn	neg
74955	23	5	mid	syn	neg
74955	24	5	early	asyn	neg
74955	25	5	early	asyn	pos
74955	26	5	early	asyn	pos
74955	27	5	mid	syn	neg
74955	28	5	mid	asyn	neg
74955	29	5	early	asyn	pos
74955	30	5	early	asyn	pos
74955	31	5	early	asyn	pos
74955	32	5	early	asyn	neg
74955	33	5	early	asyn	neg
74955	34	5	mid	asyn	neg
74955	35	5	early	asyn	neg
74955	36	5	early	asyn	neg
74955	37	5	early	asyn	neg
74955	38	5	early	asyn	neg
74955	39	5	early	asyn	neg
74955	40	5	early	asyn	pos
74955	41	5	early	asyn	neg
74955	42	5	early	asyn	neg
74955	43	5	early	syn	neg
74955	44	5	early	asyn	pos
74955	45	5	early	asyn	pos
74955	46	5	mid	syn	neg
74955	47	5	late	syn	pos
74955	48	5	early	asyn	neg
74955	49	5	early	asyn	neg
74955	50	5	early	asyn	pos
74955	51	5	early	asyn	pos
74955	52	5	mid	syn	neg
74955	53	5	early	syn	pos
74955	54	5	early	syn	neg
74955	55	5	early	syn	neg
74955	56	5	early	asyn	pos
74955	57	5	early	asyn	neg
74955	58	5	early	asyn	neg
74955	59	5	early	asyn	neg
74955	60	5	mid	syn	pos
74955	61	5	mid	asyn	neg
74955	62	5	mid	syn	neg
74955	63	5	early	syn	neg
74955	64	5	early	asyn	pos
74955	65	5	early	asyn	pos
74955	66	5	early	asyn	neg
85545	1	5	mid	asyn	neg
85545	2	5	late	syn	neg
85545	3	5	late	syn	neg
85545	4	5	early	asyn	neg
85545	5	5	early	asyn	neg
85545	6	5	early	asyn	neg
85545	7	5	mid	asyn	neg
85545	8	5	mid	asyn	neg
85545	9	5	late	syn	neg
85545	10	5	mid	syn	neg
85545	11	5	mid	syn	neg
85545	12	5	mid	syn	neg
85545	13	5	early	asyn	neg
85545	14	5	early	asyn	neg
85545	15	5	early	asyn	neg
85545	16	5	mid	asyn	pos
85545	17	5	early	asyn	neg
85545	18	5	early	asyn	neg
85545	19	5	mid	syn	neg
85545	20	5	early	asyn	neg
85545	21	5	early	asyn	neg
85545	22	5	early	asyn	neg
85545	23	5	early	asyn	neg
85545	24	5	early	syn	neg
85545	25	5	early	syn	neg
85545	26	5	early	syn	neg
85545	27	5	early	asyn	neg
85545	28	5	early	asyn	neg
85545	29	5	early	asyn	neg
85545	30	5	early	asyn	neg
85545	31	5	early	asyn	neg
85545	32	5	early	asyn	neg
85545	33	5	early	asyn	neg
85545	34	5	early	asyn	neg
85545	35	5	late	asyn	neg
85545	36	5	mid	syn	neg
85545	37	5	mid	asyn	neg
85545	38	5	early	asyn	neg
85545	39	5	early	asyn	neg
85545	40	5	early	asyn	neg
85545	41	5	early	asyn	neg
85545	42	5	early	asyn	pos
85545	43	5	early	asyn	pos
85545	44	5	early	asyn	pos
85545	45	5	early	syn	pos
85545	46	5	early	syn	pos
85545	47	5	early	asyn	pos
85545	48	5	early	asyn	neg
85545	49	5	mid	asyn	pos
85545	50	5	mid	syn	neg
85545	51	5	late	syn	neg
85545	52	5	early	asyn	pos
85545	53	5	early	asyn	neg
85545	54	5	late	asyn	neg
85545	55	5	early	syn	pos
85545	56	5	mid	asyn	neg
85545	57	5	mid	asyn	neg
85545	58	5	early	asyn	neg
85545	59	5	early	asyn	neg
85545	60	5	early	asyn	neg
85545	61	5	early	asyn	neg
85545	62	5	early	asyn	neg
85545	63	5	early	asyn	neg
85545	64	5	late	asyn	neg
85545	65	5	mid	asyn	pos
85545	66	5	early	asyn	neg
85545	67	5	mid	asyn	neg
74957	1	10	early	asyn	neg
74957	2	10	early	asyn	neg
74957	3	10	early	asyn	pos
74957	4	10	early	asyn	neg
74957	5	10	early	asyn	neg
74957	6	10	late	syn	neg
74957	7	10	early	asyn	pos
74957	8	10	mid	asyn	neg
74957	9	10	early	asyn	pos
74957	10	10	early	syn	pos
74957	11	10	early	asyn	pos
74957	12	10	early	asyn	pos
74957	13	10	early	asyn	pos
74957	14	10	late	syn	neg
74957	15	10	early	asyn	pos
74957	16	10	early	asyn	neg
74957	17	10	mid	asyn	neg
74957	18	10	early	asyn	pos
74957	19	10	early	syn	neg
74957	20	10	mid	asyn	neg
74957	21	10	early	asyn	pos
74957	22	10	early	asyn	pos
74957	23	10	early	asyn	pos
74957	24	10	early	asyn	pos
74957	25	10	late	syn	neg
74957	26	10	late	syn	neg
74957	27	10	early	asyn	pos
74957	28	10	early	asyn	pos
74957	29	10	early	asyn	pos
74957	30	10	early	asyn	pos
74957	31	10	early	asyn	pos
74957	32	10	mid	asyn	neg
74957	33	10	early	syn	pos
74957	34	10	early	asyn	pos
74957	35	10	early	asyn	pos
74957	36	10	early	asyn	pos
74957	37	10	mid	asyn	neg
74957	38	10	mid	asyn	neg
74957	39	10	early	syn	pos
74957	40	10	mid	asyn	pos
74957	41	10	mid	syn	neg
74957	42	10	early	asyn	neg
74957	43	10	early	asyn	neg
74957	44	10	early	asyn	neg
74957	45	10	mid	asyn	neg
74957	46	10	late	syn	neg
74957	47	10	early	syn	neg
74957	48	10	mid	asyn	pos
74957	49	10	early	asyn	neg
74957	50	10	early	asyn	neg
74957	51	10	early	asyn	neg
74957	52	10	early	asyn	pos
74957	53	10	mid	asyn	neg
74957	54	10	late	asyn	neg
74957	55	10	mid	asyn	neg
74957	56	10	early	syn	pos
74957	57	10	mid	asyn	neg
74957	58	10	mid	asyn	neg
74957	59	10	early	asyn	pos
74957	60	10	early	asyn	pos
74957	61	10	early	syn	neg
74957	62	10	early	asyn	pos
74957	63	10	early	asyn	pos
74957	64	10	early	asyn	pos
74957	65	10	mid	asyn	neg
74957	66	10	mid	asyn	neg
74957	67	10	early	asyn	neg
74957	68	10	early	asyn	neg
74957	69	10	early	asyn	neg
74957	70	10	late	syn	neg
74957	71	10	late	syn	neg
74957	72	10	early	asyn	pos
74957	73	10	early	asyn	pos
74957	74	10	early	asyn	pos
74957	75	10	early	asyn	pos
74957	76	10	early	asyn	neg
74957	77	10	late	syn	neg
74957	78	10	mid	asyn	neg
74957	79	10	mid	syn	neg
74957	80	10	mid	syn	neg
74957	81	10	early	asyn	pos
74957	82	10	early	asyn	pos
74957	83	10	early	asyn	pos
74957	84	10	early	asyn	pos
74957	85	10	early	asyn	pos
74957	86	10	early	asyn	pos
74957	87	10	late	syn	neg
74957	88	10	late	syn	neg
74957	89	10	early	asyn	neg
74957	90	10	mid	syn	neg
74957	91	10	mid	asyn	pos
74957	92	10	mid	asyn	pos
74957	93	10	mid	syn	neg
74959	1	10	early	asyn	pos
74959	2	10	mid	asyn	pos
74959	3	10	early	asyn	pos
74959	4	10	mid	asyn	neg
74959	5	10	mid	syn	neg
74959	6	10	early	asyn	pos
74959	7	10	mid	syn	neg
74959	8	10	early	syn	neg
74959	9	10	early	asyn	neg
74959	10	10	early	syn	pos
74959	11	10	early	asyn	pos
74959	12	10	early	asyn	pos
74959	13	10	early	asyn	neg
74959	14	10	late	syn	neg
74959	15	10	mid	asyn	neg
74959	16	10	early	syn	pos
74959	17	10	mid	syn	pos
74959	18	10	mid	syn	pos
74959	19	10	early	asyn	neg
74959	20	10	mid	syn	pos
74959	21	10	early	asyn	neg
74959	22	10	early	asyn	neg
74959	23	10	early	asyn	neg
74959	24	10	early	asyn	neg
74959	25	10	early	asyn	pos
74959	26	10	early	asyn	pos
74959	27	10	early	asyn	pos
74959	28	10	late	syn	neg
74959	29	10	late	syn	neg
74959	30	10	mid	syn	pos
74959	31	10	late	syn	neg
74959	32	10	early	asyn	neg
74959	33	10	early	asyn	neg
74959	34	10	early	asyn	neg
74959	35	10	mid	asyn	neg
74959	36	10	early	asyn	neg
74959	37	10	mid	asyn	neg
74959	38	10	late	syn	neg
74959	39	10	early	asyn	pos
74959	40	10	early	asyn	neg
74959	41	10	early	asyn	neg
74959	42	10	early	asyn	neg
74959	43	10	early	asyn	neg
74959	44	10	early	asyn	neg
74959	45	10	mid	asyn	neg
74959	46	10	mid	asyn	pos
74959	47	10	late	syn	neg
74959	48	10	late	syn	neg
74959	49	10	mid	syn	neg
74959	50	10	late	syn	neg
74959	51	10	late	syn	neg
74959	52	10	early	asyn	neg
74959	53	10	late	syn	neg
74959	54	10	mid	syn	neg
74959	55	10	late	asyn	neg
74959	56	10	late	asyn	neg
74959	57	10	late	asyn	neg
74959	58	10	late	asyn	neg
74959	59	10	early	asyn	neg
74959	60	10	early	asyn	neg
74959	61	10	early	asyn	neg
74959	62	10	early	asyn	neg
74959	63	10	late	asyn	neg
74959	64	10	late	asyn	neg
74959	65	10	mid	asyn	pos
74959	66	10	early	syn	neg
74959	67	10	mid	asyn	neg
85546	1	10	early	asyn	neg
85546	2	10	early	asyn	pos
85546	3	10	mid	asyn	neg
85546	4	10	mid	syn	pos
85546	5	10	mid	syn	neg
85546	6	10	early	asyn	neg
85546	7	10	early	syn	neg
85546	8	10	early	asyn	neg
85546	9	10	late	syn	neg
85546	10	10	early	asyn	neg
85546	11	10	early	syn	neg
85546	12	10	early	asyn	neg
85546	13	10	early	asyn	pos
85546	14	10	mid	syn	neg
85546	15	10	early	asyn	neg
85546	16	10	mid	syn	neg
85546	17	10	early	asyn	pos
85546	18	10	early	asyn	neg
85546	19	10	early	asyn	neg
85546	20	10	early	asyn	neg
85546	21	10	mid	asyn	neg
85546	22	10	early	syn	pos
85546	23	10	early	asyn	neg
85546	24	10	late	syn	neg
85546	25	10	mid	syn	neg
85546	26	10	early	asyn	pos
85546	27	10	early	asyn	pos
85546	28	10	early	syn	neg
85546	29	10	early	asyn	neg
85546	30	10	mid	syn	neg
85546	31	10	mid	asyn	neg
85546	32	10	early	asyn	pos
85546	33	10	early	asyn	pos
85546	34	10	early	asyn	pos
85546	35	10	early	asyn	pos
85546	36	10	early	asyn	pos
85546	37	10	early	asyn	pos
85546	38	10	early	asyn	pos
85546	39	10	early	asyn	pos
85546	40	10	late	syn	neg
85546	41	10	early	asyn	pos
85546	42	10	early	asyn	pos
85546	43	10	early	asyn	pos
85546	44	10	mid	syn	neg
85546	45	10	early	asyn	neg
85546	46	10	mid	syn	pos
85546	47	10	early	asyn	neg
85546	48	10	mid	syn	neg
85546	49	10	mid	asyn	neg
