# Supplementary figures and images for: Cisplatin-induced DNA double-strand breaks promote meiotic chromosome synapsis in PRDM9-controlled mouse hybrid sterility
Source: eLife journal article supplement (doi:10.7554/elife.42511), 2018-12-28

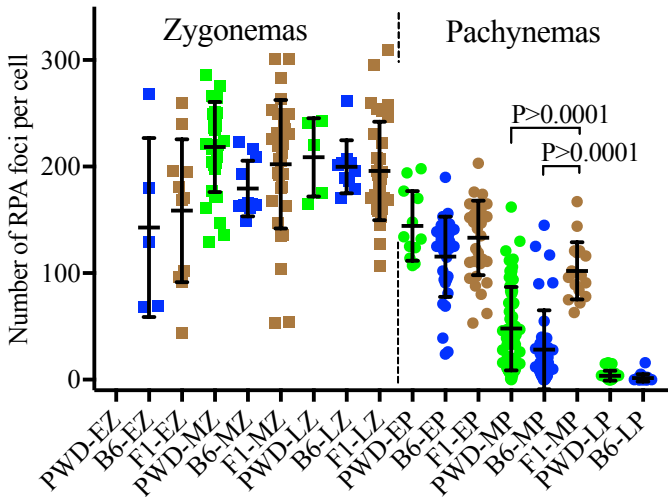

Supplement: supp [file elife-42511-supp-v1.zip]

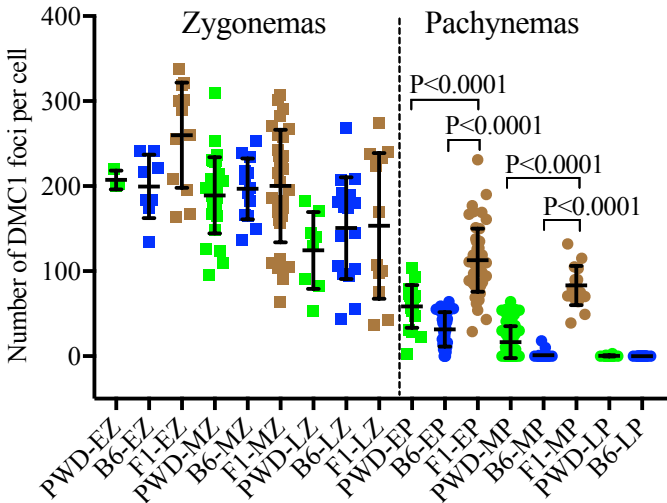

Supplement: supp [file elife-42511-supp-v1.zip]
